# Supplementary material for: Investigation on the doping of dyes in single crystalline anhydrous guanine microplatelets and their optical properties
Source: Royal Society of Chemistry journal article supplement (doi:10.1039/d4ce01092b), 2025-01-01
Supplement: d4ce01092b2.pdf [file d4ce01092b2.pdf]

## Supplementary Materials:

### Investigation on the doping of dyes in the single crystalline anhydrous guanine microplatelet and their optical properties

Dongmei Guo,<sup>ab</sup> Ying Zhang,<sup>a</sup> Chuyi Liang,<sup>a</sup> Jingyan Hao,<sup>a</sup> Clara Gonzalez,<sup>a</sup> Juan Gao,<sup>a</sup> Yurong Ma<sup>\*a</sup>

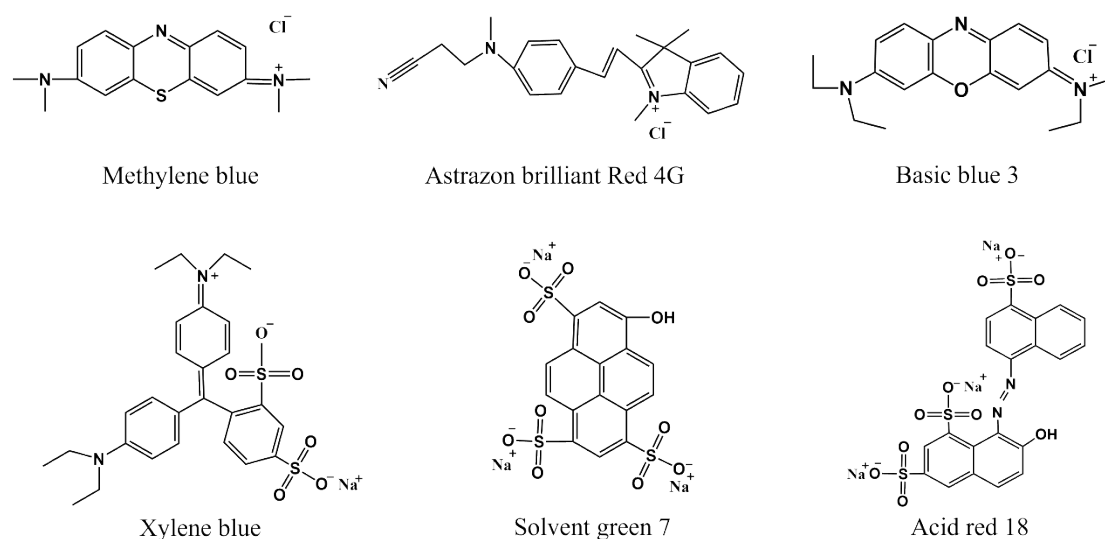

**Figure S1.** Structure formulas of ionic dyes used for doping experiments.

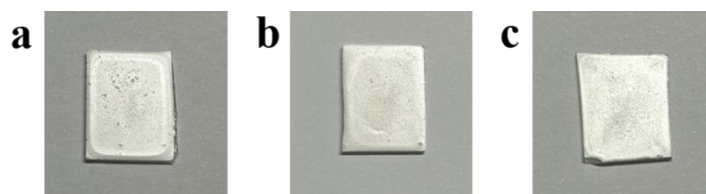

**Figure S2.** Photographs of  $\beta$ -AG crystals doped with (a) xylene blue, (b) solvent green 7 and (c) acid red 18.

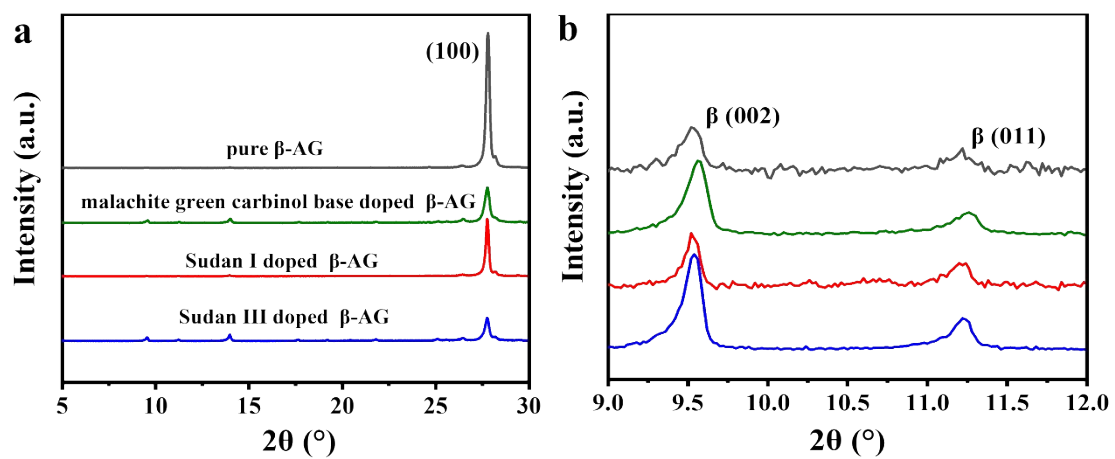

**Figure S3.** PXRD patterns of synthesized molecular dye-doped  $\beta$ -AG crystals in the  $2\theta$  range of (a) 5-30° and (b) 9-12°.

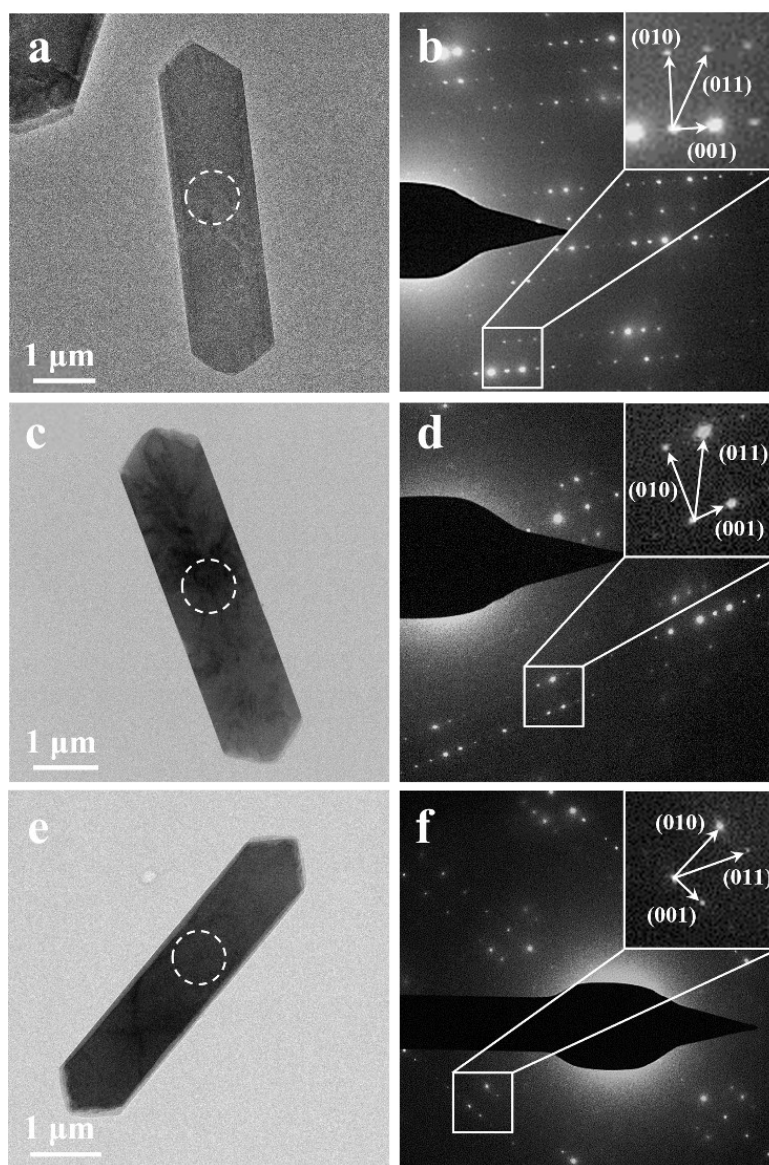

**Figure S4.** (a) TEM image and (b) corresponding SAED pattern of malachite green carbinol base doped  $\beta$ -AG crystals, (c) TEM image and (d) corresponding SAED pattern of Sudan I doped  $\beta$ -AG crystals, (e) TEM image and (f) corresponding SAED pattern of Sudan III doped  $\beta$ -AG crystals.

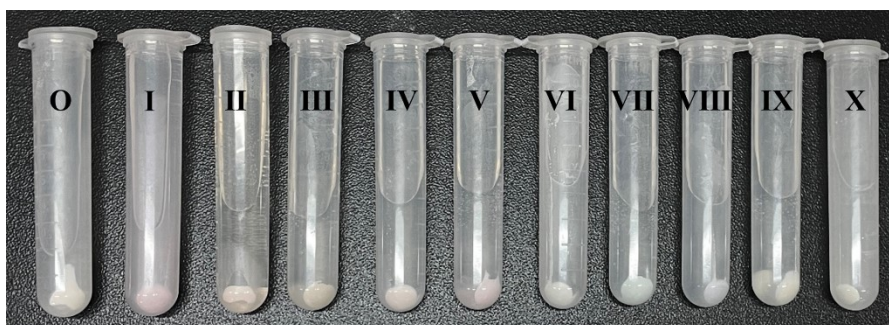

**Figure S5.** Photographs of (O) pure  $\beta$ -AG crystals,  $\beta$ -AG crystals after adsorbed (I) Sudan III, (II) Sudan I, (III) cationic golden yellow X-GL, (IV) cationic brilliant red 4G, (V) astrazon pink FG, (VI) basic blue 3, (VII) methylene blue, (VIII) crystalline violet, (IX) basic green 4 and (X) malachite green carbinol base.

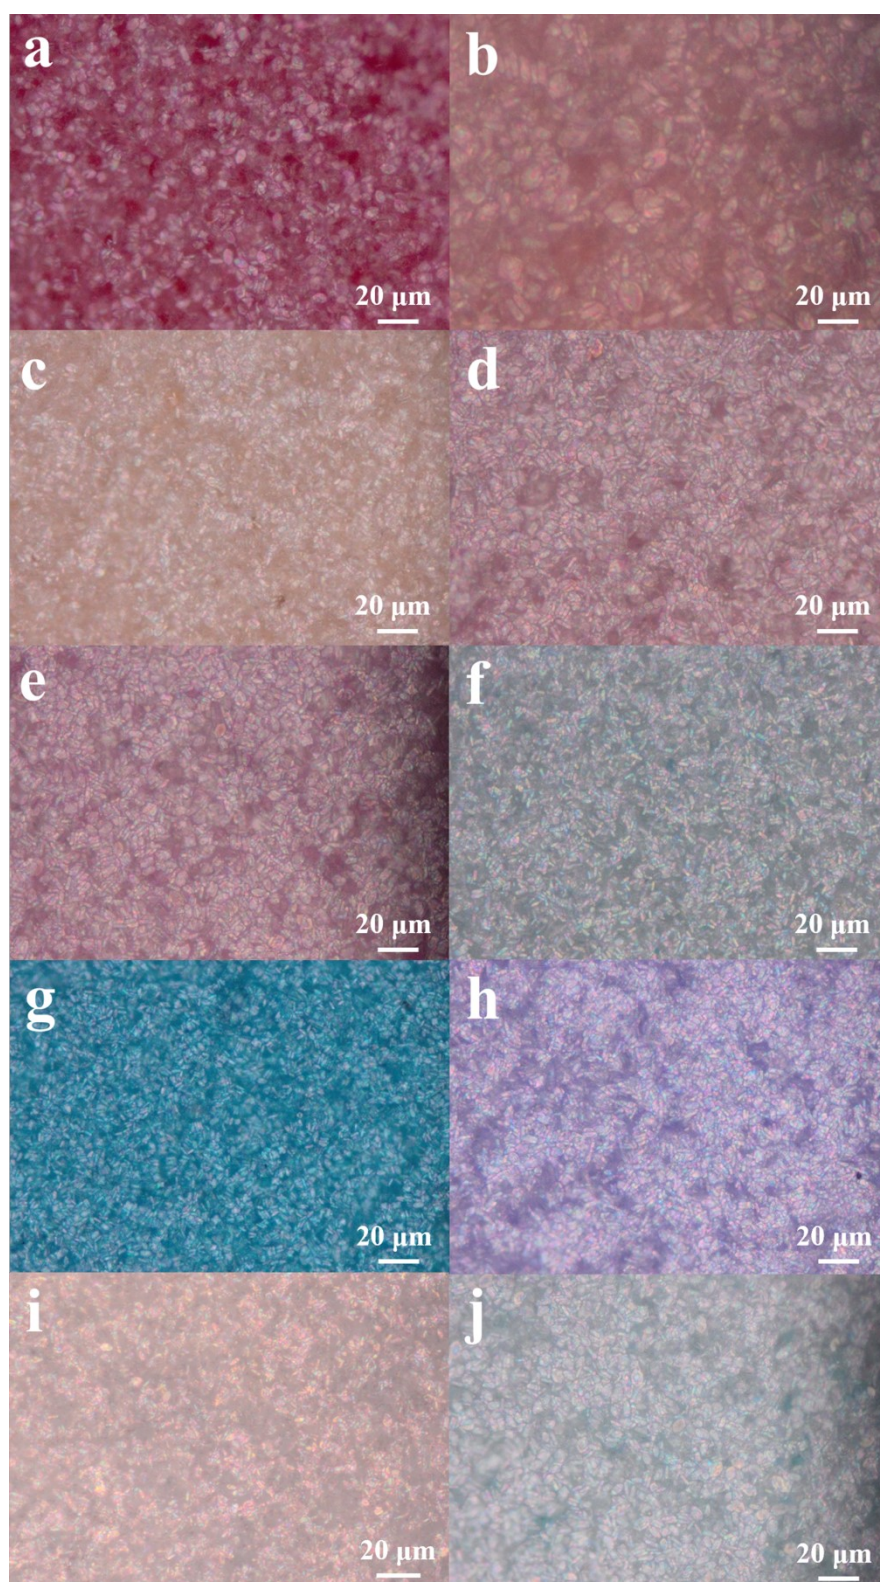

**Figure S6.** Optical microscope images of colored  $\beta$ -AG crystals doped with different dyes, (a) Sudan III, (b) Sudan I, (c) cationic golden yellow X-GL, (d) cationic brilliant red 4G, (e) astrazon pink FG, (f) basic blue 3, (g) methylene blue, (h) crystalline violet, (i) basic green 4 and (j) malachite green carbinol base.



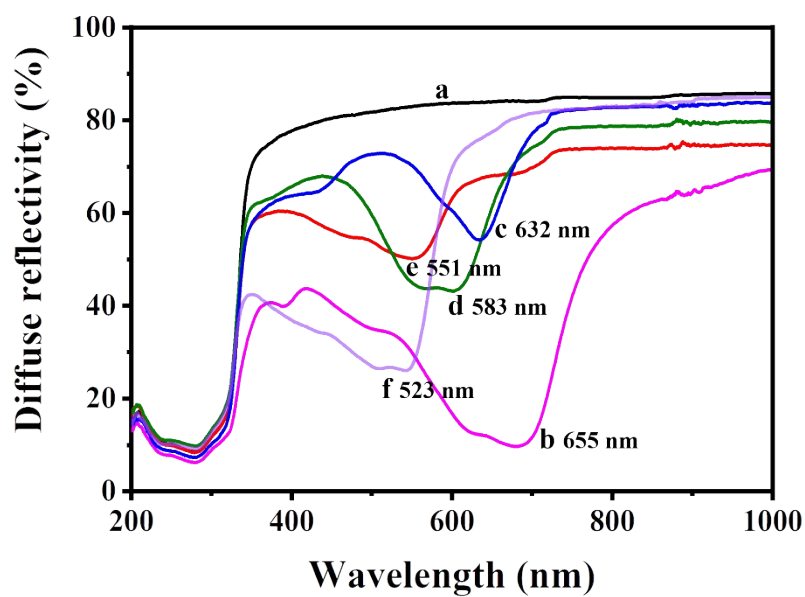

**Figure S7.** Diffuse reflection spectra of the synthesized (a) pure  $\beta$ -AG crystals, (b-f)  $\beta$ -AG crystals doped with different dyes, (b) methylene blue, (c) malachite green carbinol base, (d) crystalline violet, (e) cationic brilliant red 4G, (f) Sudan I.
